# Supplementary material for: Ketone Bodies Improve Human CD8+ Cytotoxic T-Cell Immune Response During COVID-19 Infection
Source: Frontiers journal article supplement (doi:10.3389/fmed.2022.923502), 2022-06-16
Supplement: Data_Sheet_1.PDF [file Data_Sheet_1.PDF]

## Supplementary Material

# Ketone Bodies improve human CD8<sup>+</sup> cytotoxic T-cell immune response during COVID-19 infection

**Simon Hirschberger<sup>1,2</sup>; Luca Gellert<sup>2</sup>; David Effinger<sup>1,2</sup>; Maximilian Münchhoff<sup>3,5</sup>; Markus Herrmann<sup>4,5</sup>; Josef-Maria Briegel<sup>1,5</sup>; Bernhard Zwißler<sup>1,5</sup>; Simone Kreth<sup>1,2,\*</sup>**

**1** Department of Anaesthesiology, Research Unit Molecular Medicine, LMU University Hospital, Ludwig-Maximilian-University Munich (LMU), Munich, 81377, Germany.

**2** Walter Brendel Center of Experimental Medicine, Ludwig-Maximilian-University Munich (LMU), Munich, 81377, Germany.

**3** Max von Pettenkofer Institute and Gene Center, Virology, National Reference Center for Retroviruses, Faculty of Medicine, Ludwig-Maximilian-University Munich (LMU), Munich, 81377, Germany.

**4** Department of Medicine III, LMU University Hospital, Ludwig-Maximilian-University Munich (LMU), Munich, 81377, Germany.

**5** COVID-19 Registry of the LMU Munich (CORKUM), LMU University Hospital, LMU Munich

**\* Correspondence:**

Simone Kreth, MD, PhD. Walter Brendel Center of Experimental Medicine, Ludwig-Maximilian-University Munich (LMU). Marchioninistreet 68, 81377, Munich, Germany. [simone.kreth@med.uni-muenchen.de](mailto:simone.kreth@med.uni-muenchen.de). +49 - 89 - 2180 76508

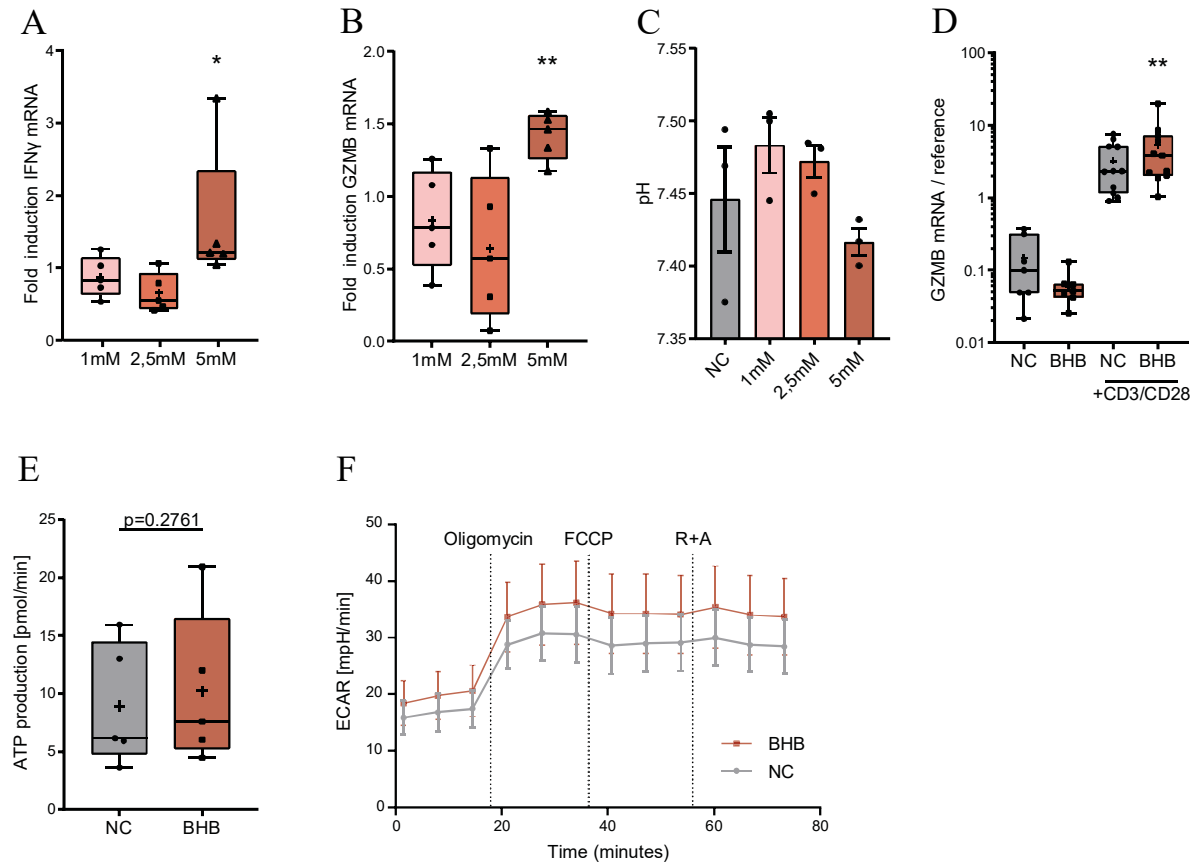

### Figure S1 Elevated ATP production and ECAR in response to BHB

Human peripheral blood mononuclear cells (PBMC) were cultivated for 5d in RPMI containing 80mg/dl glucose (NC) and supplemented with 2mM, 5mM and 10mM D/L-beta-hydroxybutyrate (Figure S1A/B) or only 10mM D/L-beta-hydroxybutyrate (BHB | S1C/D). T-cell stimulation was performed through CD3/CD28 Dynabeads at a bead:cell ratio of 1:8. CD8<sup>+</sup> T cells were isolated via magnetic cell separation. Fold induction of **A** IFN $\gamma$  and **B** GZMB mRNA relative to normal control, quantified in human T cells cultivated with varying concentrations of D-BHB (corresponding to 2mM, 5mM and 10mM racemic D/L-BHB) as indicated, n=5 biological replicates. **C** pH of cell culture in response to various BHB concentrations as indicated, measured on a Siemens RAPIDlab 1265, n=3. **D** mRNA expression of GZMB in unstimulated and CD3/CD28-stimulated human T cells relative to internal controls, n=7/7/11/11 biological replicates. **E** ATP production and **F** Extracellular Acidification Rate (ECAR) were measured using a *Seahorse* HS Mini Analyzer, n=5 individual patient samples, each performed in 2-3 technical replicates. Data depicted as mean  $\pm$  SEM (ECAR) and box plots with median, twenty-fifth and seventy-fifth percentiles and range (all other). Dots indicating individual values. \*p<0.05, \*\*p<0.01, paired t-test/ Wilcoxon matched-pairs signed rank test, as appropriate.

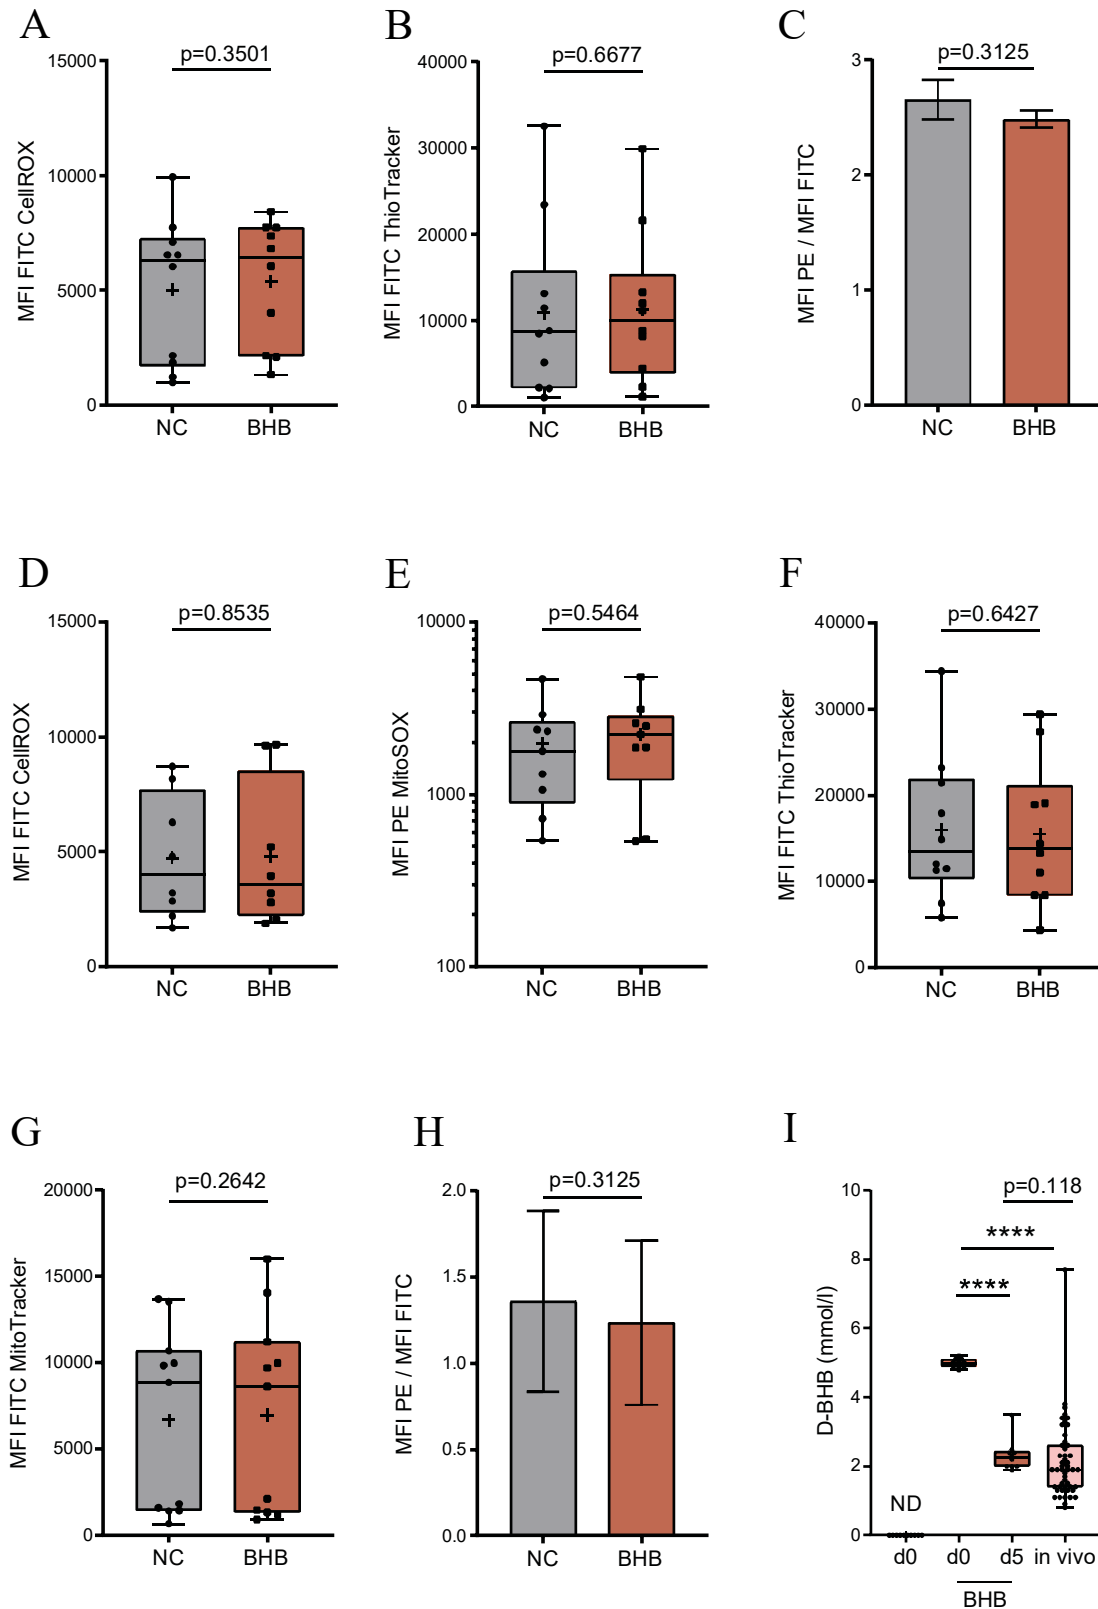

**Figure S2 Sustained mitohormesis in response to BHB and no effect of BHB on CD4 cells**  
Human peripheral blood mononuclear cells (PBMC) were cultivated for 5d in RPMI containing 80 mg/dl glucose (NC) and supplemented with 10mM D/L-beta-hydroxybutyrate (BHB). T-

cell stimulation was performed through CD3/CD28 Dynabeads at a bead:cell ratio of 1:8. CD8<sup>+</sup> T cells were isolated via magnetic cell separation. **A** Cellular reactive oxygen species (ROS) quantified through CellROX, indicated by MFI FITC in human CD8<sup>+</sup> T cells, n=10 individual patient samples. **B** Analysis of cellular glutathione content using ThioTracker, depicted as MFI FITC in human CD8<sup>+</sup> T cells, n=10 individual patient samples. **C** Evaluation of mitochondrial membrane potential using JC-1, analyzed as MFI PE/ MFI FITC in human CD8<sup>+</sup> T cells, FCCP served as the negative control, n = 6 individual patient samples. **D** Cellular reactive oxygen species (ROS) quantified through CellROX, indicated by MFI FITC in human CD4<sup>+</sup> T cells, n=8 individual patient samples. **E** Quantification of mitochondrial superoxide production using MitoSOX, displayed as MFI PE in human CD4<sup>+</sup> T cells, n=9 individual patient samples. **F** Analysis of cellular glutathione content using ThioTracker, depicted as MFI FITC in human CD4<sup>+</sup> T cells, n=11 individual patient samples. **G** Mitochondrial mass determined via MitoTracker green, indicated by MFI FITC in human CD4<sup>+</sup> T cells, n=10 individual patient samples. **H** Evaluation of mitochondrial membrane potential using JC-1, analyzed as MFI PE/ MFI FITC in human CD4<sup>+</sup> T cells, FCCP served as the negative control, n = 5 individual patient samples. **I** Concentration of D-BHB in cell culture supernatant of patient PBMC at the start (d0, NC and BHB) and at the end (d5) of T-cell stimulation, compared to in vivo serum D-BHB concentration of healthy volunteers on a three-weeks KD, measured at the end of the diet. D-BHB quantified by point of care testing using a Glucomen Aero 2K (Berlin Chemie AG, Berlin, Germany), n=10/10/10/49, ND=not detectable. Data depicted as mean  $\pm$  SEM (JC1) and box plots with median, twenty-fifth and seventy-fifth percentiles and range (all other). Dots indicating individual values. \*p<0.05, \*\*p<0.01, \*\*\*\*p<0.0001, paired t-test/ Wilcoxon matched-pairs signed rank test, as appropriate.

**Table S1 Primers and Probes**

| Target | Primer for                    | Primer rev                  | Probe |
|--------|-------------------------------|-----------------------------|-------|
| TBP    | 5' GAACATCATGGATCAGAACAACA 3' | 5' ATAGGGATTCCGGGAGTCAT 3'  | 87    |
| SDHA   | 5' GAGGCAGGGTTTAATACAGCA 3'   | 5' CCAGTTGTCCTCCTCCATGT 3'  | 132   |
| GZMB   | 5' GGGGGACCCAGAGATTAAAA 3'    | 5' CCATTGTTTCGTCCATAGGAG 3' | 37    |
| IFNy   | 5' GGCATTTTGAAGAATTGGAAG 3'   | 5' TTTGGATGCTCTGGTCATCTT 3' | 21    |
